# Supplementary material
Source: publisher site journal article supplement (https://www.degruyterbrill.com/publication/dbid/tjgo/downloadAsset/TJGO_TJGO_Editionsspezifische_Hinweise_zur_Suche.pdf)
Supplement: Supplementary file 1 [file TJGO_TJGO_Editionsspezifische_Hinweise_zur_Suche.pdf]

# Editionsspezifische Hinweise zur Suche

- **Datumssuche:** Im gängigen achtstelligen Format (Beispiel: 01.02.1938) – gesucht werden kann auch nach einem Jahr (Beispiel: 1938) oder nach einem Monat in einem Jahr (Beispiel: 02.1938)
- **Schlagwortsuche:** Diese Suche erschließt das Sachregister der Printausgabe. Schlagworte aus allen Ebenen können über AutoComplete gebrowst werden (z.B. Antibolschewismus)  
Eine **Schlagwortliste** zu jedem Tagebucheintrag findet sich unter allen Artikeln in einem ausklappbaren Bereich. Mit Hilfe dieser Schlagworte lässt sich themenspezifisch weiterrecherchieren.
- **Personensuche:** Suchbar sind sämtliche zeitgenössische und historische Personennamen. Diese wurden verifiziert, fehlende Vor- oder Familiennamen soweit wie möglich ergänzt.
- **Ortssuche:** Hier können Orte, Stadtteile, Landschaftselemente (wie Inseln, Flüsse, Gebirge) gesucht werden.
- **Quellensuche:** Suche in den Kopfregesten der Tagebucheinträge
- **DOI-Suche:** Jedem Tagebucheintrag ist eine DOI zugewiesen. Diese kann hier gesucht werden. Formatbeispiel: "10.1515/tjgo\_01.02.1945"
- Die **Berichte zur „Militärischen Lage“** sind aufgrund der unsicheren Autorschaft zur optischen Kennzeichnung etwas eingerückt.

Weitere **Spezifika der Edition** entnehmen Sie bitte dem PDF „Zur Einrichtung der Edition“.

## Allgemeine Hinweise zur Suche

- AutoComplete-Dropdown bei der Eingabe von Suchbegriffen hilft bei der zielgenauen Suche
- Abkürzungen werden per Mouseover angezeigt
- Mit \* können ein oder mehrere Zeichen trunkiert werden, mit „?“ ein einzelnes Zeichen
- Wortfolgen können mit Anführungszeichen gefunden werden (z.B. „Tapferkeit der Griechen“)

## Weitere Hinweise

Bitte registrieren Sie sich kostenlos auf **De Gruyter Online**, um die nachfolgenden Funktionen nutzen zu können:

- **Zitierfunktion:** Über die Exportfunktion („Zitation/Exportieren“) können Sie einen Datensatz im RIS-Format erzeugen, den Sie anschließend in Ihr Zitierprogramm importieren können. Zusätzlich können Sie sich Zitate eines Datensatzes in Form der Zitiersysteme Chicago, APA und MLA anzeigen lassen.
- **Notiz hinzufügen:** Hier können Sie Ihre persönlichen Kommentare verfassen und zu einem späteren Zeitpunkt unter „Mein De Gruyter“ – „Private Notiz“ wiederfinden.
- **Merken:** Zum schnellen Abspeichern einzelner Einträge.
